# Supplementary material for: Detection of ice core particles via deep neural networks
Source: Copernicus journal article supplement (doi:10.5194/tc-17-539-2023), 2023-02-07
Supplement: Supplementary file 1 [file tc-17-539-2023-supplement.zip]

Archive with 3 entries (3 files):
- Supplementary.pdf
- figS5.png
- tc-17-539-2023-supplement-title-page.pdf
