# Supplementary material for: Detection of ice core particles via deep neural networks
Source: Copernicus journal article supplement (doi:10.5194/tc-17-539-2023), 2023-02-07
Supplement: Supplementary file 1 [file tc-17-539-2023-supplement.zip › Supplementary.pdf]

*Supplement of*

# Detection of ice core particles via deep neural networks

**Niccolò Maffezzoli et al.**

*Correspondence to:* Niccolò Maffezzoli ([niccolo.maffezzoli@unive.it](mailto:niccolo.maffezzoli@unive.it))

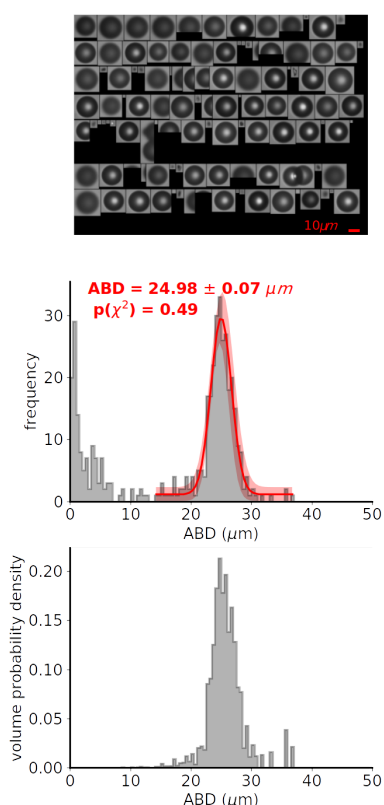

**Figure S1. Optimization of focus and threshold value.** Analysis of a 25  $\mu\text{m}$ -diameter focus beads solution at 5700/mL beads concentration. Top panel: some representative images. Middle panel: ABD size distribution ( $n=428$  particles) along with a least squares gaussian fit ( $\chi^2$  probability = 0.49,  $3\sigma$  red shaded band). The estimated mean is consistent with the reference 25  $\mu\text{m}$  value. The counts towards zero reflect small spurious particles present in the solution. Particles bigger than 25  $\mu\text{m}$  are associated with clusters of more than one particle glued together (see second last row in top panel). Bottom panel: corresponding volume density distribution.

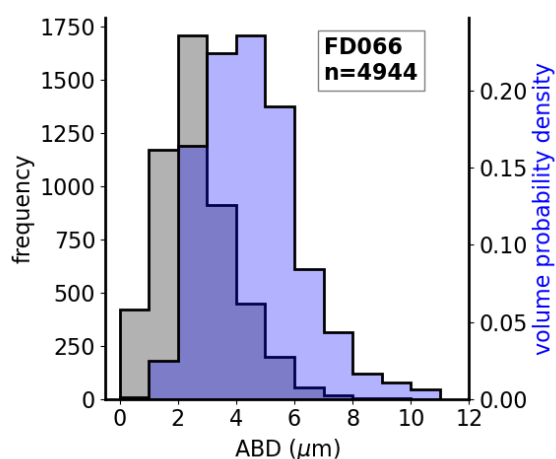

**Figure S2.** ABD size distribution (number and volume-weighted) of an FD066 sample comprising 4944 dust particles.

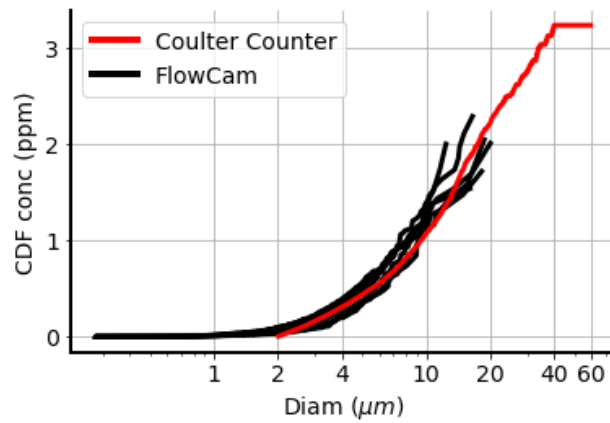

**Figure S3. Comparison between CC (red) and FlowCam (black) mass concentration of a representative Quelccaya ice core sample.** The FlowCam underestimates the concentration (2 ppm compared to the 3.2 ppm from the CC) because fewer large particles are detected.

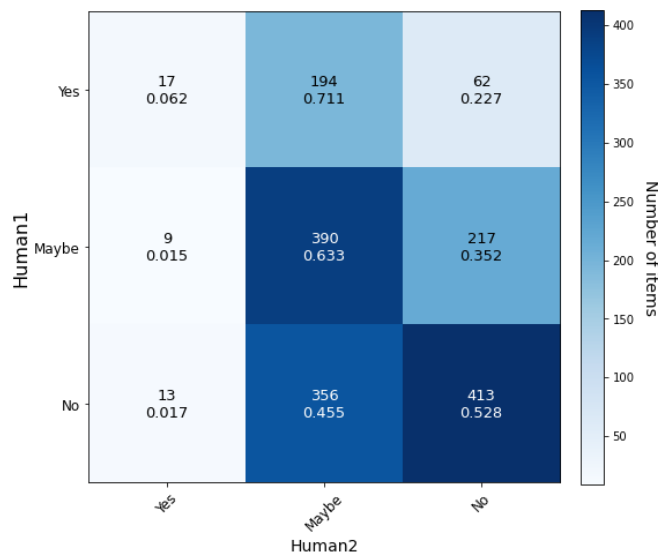

**Figure S4.** Confusion matrix between the human assessments of the n=1671 images predicted as tephra in the GRIP samples.
