# Supplementary material for: Detection of ice core particles via deep neural networks
Source: Copernicus journal article supplement (doi:10.5194/tc-17-539-2023), 2023-02-07
Supplement: Supplementary file 1 [file tc-17-539-2023-supplement.zip › tc-17-539-2023-supplement-title-page.pdf]

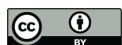

## *Supplement of*

# **Detection of ice core particles via deep neural networks**

**Niccolò Maffezzoli et al.**

*Correspondence to:* Niccolò Maffezzoli ([niccolo.maffezzoli@unive.it](mailto:niccolo.maffezzoli@unive.it))

- [tc-17-539-2023-supplement-title-page.pdf](#)
- [Supplementary.pdf](#)
- [figS5.png](#)

The copyright of individual parts of the supplement might differ from the article licence.
